# Supplementary material
Source: PubMed Central journal article supplement (PMC3819103)

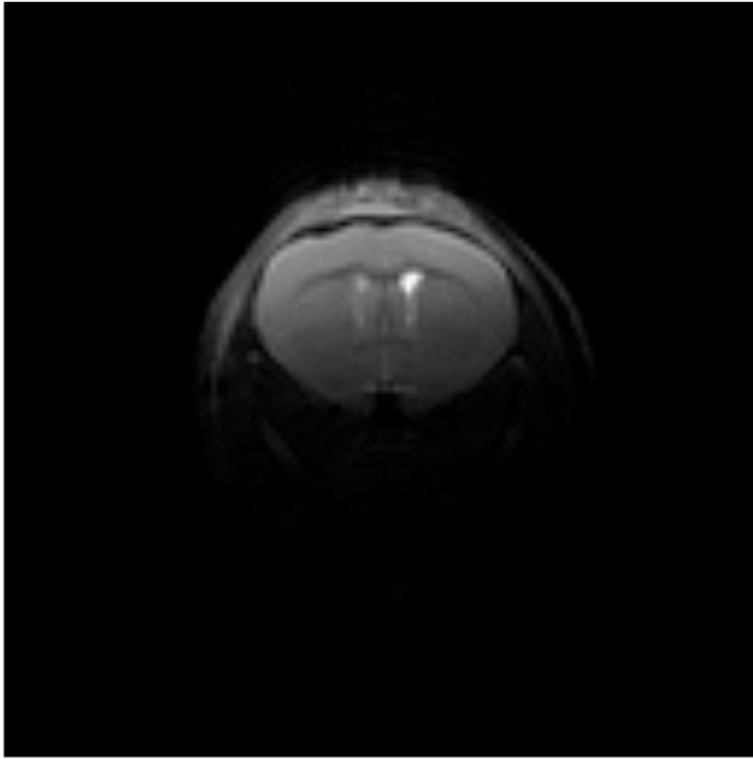

**Pre-injected**

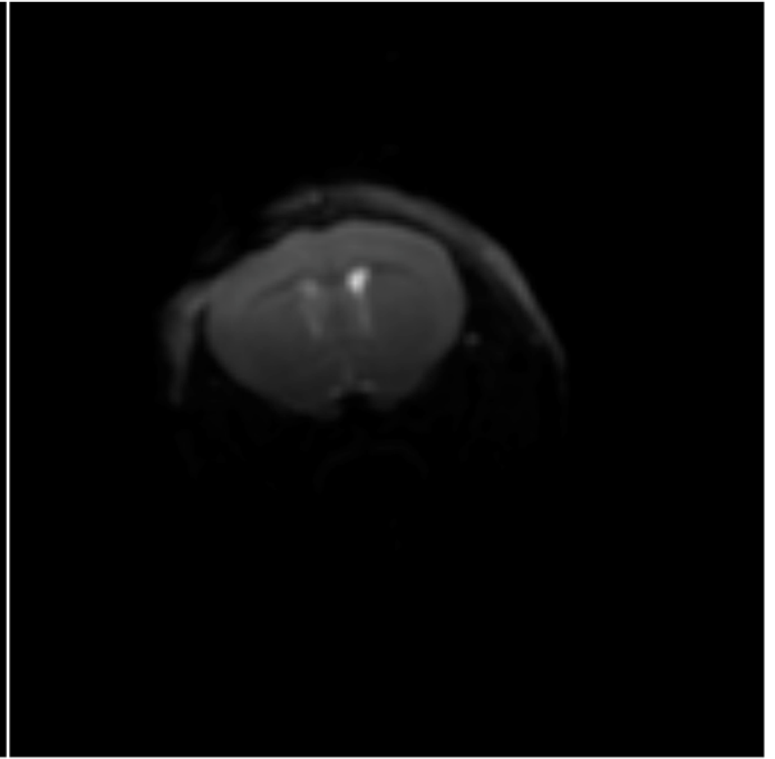

**Post-injected**

Supplement: NIHMS496085-supplement-sf3.pdf [file NIHMS496085-supplement-sf3.pdf]
